# Supplementary material
Source: PubMed Central journal article supplement (PMC6718440)

## Supplemental Information

Biophysical Characterization of Human Lipoproteins, their Subclasses and their Lipids by  $^1\text{H}$  NMR Spectroscopy

Daniela Baumstark<sup>1,3</sup>, Werner Kremer<sup>1</sup>, Alfred Boettcher<sup>2</sup>, Christina Schreier<sup>1,3</sup>, Paul Sander<sup>1</sup>, Gerd Schmitz<sup>2</sup>, Renate Kirchhoefer<sup>3,4</sup>, Fritz Huber<sup>3,4</sup>, Hans Robert Kalbitzer<sup>1\*</sup>

### Tables

**Supplemental Table S1.  $^1\text{H}$ -NMR resonances of lipids isolated in  $\text{CDCl}_3/\text{methanol-d}_4$ .<sup>a</sup>**

| Chemical shift ppm] | Compound    | Chemical group              | Position                          |
|---------------------|-------------|-----------------------------|-----------------------------------|
| 0.6949              | C           | $\text{CH}_3$               | C-18                              |
| 0.6974              | CE          | $\text{CH}_3$               | C-18                              |
| 0.8635              | C / CE      | $\text{CH}_3$               | C-26, C-27                        |
| 0.8681              | C / CE      | $\text{CH}_3$               | C-26, C-27                        |
| 0.8747              | C / CE / FA | $\text{CH}_3$               | C-26, C-27 / FA- $\text{CH}_3$    |
| 0.8790              | C / CE / FA | $\text{CH}_3$               | C-26, C-27 / FA- $\text{CH}_3$    |
| 0.8871              | FA          | $\text{CH}_3$               | FA- $\text{CH}_3$                 |
| 0.8996              | FA          | $\text{CH}_3$               | FA- $\text{CH}_3$                 |
| 0.9110              | FA          | $\text{CH}_3$               | FA- $\text{CH}_3$                 |
| 0.9229              | C / CE      | $\text{CH}_3$               | C-21                              |
| 0.9337              | C / CE      | $\text{CH}_3$               | C-21                              |
| 0.9438              | C / CE      | $\text{CH}$ , $\text{CH}_2$ | C-9, C-14, C-22                   |
| 0.9547              | C / CE      | $\text{CH}$ , $\text{CH}_2$ | C-9, C-14, C-22                   |
| 0.9667              | C / CE      | $\text{CH}$ , $\text{CH}_2$ | C-9, C-14, C-22                   |
| 0.9733              | C / CE      | $\text{CH}$ , $\text{CH}_2$ | C-9, C-14, C-22                   |
| 0.9813              | C / CE      | $\text{CH}$ , $\text{CH}_2$ | C-9, C-14, C-22                   |
| 0.9920              | C / CE      | $\text{CH}$ , $\text{CH}_2$ | C-9, C-14, C-22                   |
| 1.0013              | C / CE      | $\text{CH}$ , $\text{CH}_2$ | C-9, C-14, C-22                   |
| 1.0090              | C / CE      | $\text{CH}$ , $\text{CH}_2$ | C-9, C-14, C-22                   |
| 1.0125              | C / CE      | $\text{CH}$ , $\text{CH}_2$ | C-9, C-14, C-22                   |
| 1.0177              | C           | $\text{CH}_3$               | C-19                              |
| 1.0236              | C / CE      | $\text{CH}$ , $\text{CH}_2$ | C-9, C-14, C-22                   |
| 1.0295              | C / CE      | $\text{CH}$ , $\text{CH}_2$ | C-9, C-14, C-22                   |
| 1.0406              | CE          | $\text{CH}_3$               | C-19                              |
| 1.0523              | C / CE      | $\text{CH}$ , $\text{CH}_2$ | C-1, C-12, C-15, C-17, C-23, C-24 |
| 1.0616              | C / CE      | $\text{CH}$ , $\text{CH}_2$ | C-1, C-12, C-15, C-17, C-23, C-24 |
| 1.0711              | C / CE      | $\text{CH}$ , $\text{CH}_2$ | C-1, C-12, C-15, C-17, C-23, C-24 |
| 1.0816              | C / CE      | $\text{CH}$ , $\text{CH}_2$ | C-1, C-12, C-15, C-17, C-23, C-24 |
| 1.0920              | C / CE      | $\text{CH}$ , $\text{CH}_2$ | C-1, C-12, C-15, C-17, C-23, C-24 |
| 1.1021              | C / CE      | $\text{CH}$ , $\text{CH}_2$ | C-1, C-12, C-15, C-17, C-23, C-24 |
| 1.1104              | C / CE      | $\text{CH}$ , $\text{CH}_2$ | C-1, C-12, C-15, C-17, C-23, C-24 |
| 1.1199              | C / CE      | $\text{CH}$ , $\text{CH}_2$ | C-1, C-12, C-15, C-17, C-23, C-24 |

|           |             |                                                              |                                                 |
|-----------|-------------|--------------------------------------------------------------|-------------------------------------------------|
| 1.1286    | C / CE      | CH, CH <sub>2</sub>                                          | C-1, C-12, C-15, C-17, C-23, C-24               |
| 1.1349    | C / CE      | CH, CH <sub>2</sub>                                          | C-1, C-12, C-15, C-17, C-23, C-24               |
| 1.1452    | C / CE      | CH, CH <sub>2</sub>                                          | C-1, C-12, C-15, C-17, C-23, C-24               |
| 1.1535    | C / CE      | CH, CH <sub>2</sub>                                          | C-1, C-12, C-15, C-17, C-23, C-24               |
| 1.1677    | C / CE      | CH, CH <sub>2</sub>                                          | C-1, C-12, C-15, C-17, C-23, C-24               |
| 1.1770    | C / CE      | CH, CH <sub>2</sub>                                          | C-1, C-12, C-15, C-17, C-23, C-24               |
| 1.1873    | C / CE      | CH, CH <sub>2</sub>                                          | C-1, C-12, C-15, C-17, C-23, C-24               |
| 1.1996    | C / CE      | CH, CH <sub>2</sub>                                          | C-1, C-12, C-15, C-17, C-23, C-24               |
| 1.2090    | C / CE      | CH, CH <sub>2</sub>                                          | C-1, C-12, C-15, C-17, C-23, C-24               |
| 1.2674    | FA / C / CE | CH, CH <sub>2</sub>                                          | FA-CH <sub>2</sub> / C-16, C-20, C-22, C-23     |
| 1.2808    | FA / C / CE | CH, CH <sub>2</sub>                                          | FA-CH <sub>2</sub> / C-16, C-20, C-22, C-23     |
| 1.2929    | FA / C / CE | CH, CH <sub>2</sub>                                          | FA-CH <sub>2</sub> / C-16, C-20, C-22, C-23     |
| 1.3070    | FA / C / CE | CH, CH <sub>2</sub>                                          | FA-CH <sub>2</sub> / C-16, C-20, C-22, C-23     |
| 1.3202    | FA / C / CE | CH, CH <sub>2</sub>                                          | FA-CH <sub>2</sub> / C-16, C-20, C-22, C-23     |
| 1.3427    | C / CE / FA | CH, CH <sub>2</sub>                                          | C-16, C-20, C-22, C-23 / FA-CH <sub>2</sub>     |
| 1.3528    | C / CE / FA | CH, CH <sub>2</sub>                                          | C-16, C-20, C-22, C-23 / FA-CH <sub>2</sub>     |
| 1.3654    | C / CE / FA | CH, CH <sub>2</sub>                                          | C-16, C-20, C-22, C-23 / FA-CH <sub>2</sub>     |
| 1.3777    | C / CE / FA | CH, CH <sub>2</sub>                                          | C-16, C-20, C-22, C-23 / FA-CH <sub>2</sub>     |
| 1.4052    | C / CE / FA | CH, CH <sub>2</sub>                                          | C-16, C-20, C-22, C-23 / FA-CH <sub>2</sub>     |
| 1.4471    | C / CE      | CH, CH <sub>2</sub>                                          | C-7, C-8, C-11, C-15, C-25                      |
| 1.4516    | C / CE      | CH, CH <sub>2</sub>                                          | C-7, C-8, C-11, C-15, C-25                      |
| 1.4638    | C / CE      | CH, CH <sub>2</sub>                                          | C-7, C-8, C-11, C-15, C-25                      |
| 1.4818    | C / CE      | CH, CH <sub>2</sub>                                          | C-7, C-8, C-11, C-15, C-25                      |
| 1.4910    | C / CE      | CH, CH <sub>2</sub>                                          | C-7, C-8, C-11, C-15, C-25                      |
| 1.5148    | C / CE      | CH, CH <sub>2</sub>                                          | C-7, C-8, C-11, C-15, C-25                      |
| 1.5262    | C / CE      | CH, CH <sub>2</sub>                                          | C-7, C-8, C-11, C-15, C-25                      |
| 1.5368    | C / CE      | CH, CH <sub>2</sub>                                          | C-7, C-8, C-11, C-15, C-25                      |
| 1.5478    | C / CE      | CH, CH <sub>2</sub>                                          | C-7, C-8, C-11, C-15, C-25                      |
| 1.5599    | C / CE      | CH, CH <sub>2</sub>                                          | C-7, C-8, C-11, C-15, C-25                      |
| 1.5797    | C / CE / FA | CH <sub>2</sub> / CH <sub>2</sub> -CH <sub>2</sub> -COO      | C-7, C-8, C-11, C-15, C-25 / FA-CH <sub>2</sub> |
| 1.5849    | C / CE / FA | CH <sub>2</sub> / CH <sub>2</sub> -CH <sub>2</sub> -COO      | C-7, C-8, C-11, C-15, C-25 / FA-CH <sub>2</sub> |
| 1.6049    | C / CE / FA | CH <sub>2</sub> / CH <sub>2</sub> -CH <sub>2</sub> -COO      | C-7, C-8, C-11, C-15, C-25 / FA-CH <sub>2</sub> |
| 1.6233    | FA          | CH <sub>2</sub> -CH <sub>2</sub> -COO                        | FA-CH <sub>2</sub>                              |
| 1.6352    | FA          | CH <sub>2</sub> -CH <sub>2</sub> -COO                        | FA-CH <sub>2</sub>                              |
| 1.67-1.78 | FA          | CH=CH-CH <sub>2</sub> -CH <sub>2</sub> -CH <sub>2</sub> -COO | FA-CH <sub>2</sub>                              |
| 1.8171    | C / CE      | CH <sub>2</sub>                                              | C-1, C-2, C-16                                  |
| 1.8278    | C / CE      | CH <sub>2</sub>                                              | C-1, C-2, C-16                                  |
| 1.8337    | C / CE      | CH <sub>2</sub>                                              | C-1, C-2, C-16                                  |
| 1.8444    | C / CE      | CH <sub>2</sub>                                              | C-1, C-2, C-16                                  |
| 1.8547    | C / CE      | CH <sub>2</sub>                                              | C-1, C-2, C-16                                  |
| 1.8672    | C / CE      | CH <sub>2</sub>                                              | C-1, C-2, C-16                                  |
| 1.8750    | C / CE      | CH <sub>2</sub>                                              | C-1, C-2, C-16                                  |
| 1.8804    | CE          | CH <sub>2</sub>                                              | C-2                                             |
| 1.8967    | CE          | CH <sub>2</sub>                                              | C-2                                             |
| 1.9028    | CE          | CH <sub>2</sub>                                              | C-2                                             |
| 1.9152    | CE          | CH <sub>2</sub>                                              | C-2                                             |
| 1.9644    | C / CE      | CH <sub>2</sub>                                              | C-7, C-12                                       |
| 1.9734    | C / CE      | CH <sub>2</sub>                                              | C-7, C-12                                       |

|        |             |                                                        |                               |
|--------|-------------|--------------------------------------------------------|-------------------------------|
| 1.9807 | C / CE      | $\text{CH}_2$                                          | C-7, C-12                     |
| 2.0034 | C / CE / FA | $\text{CH}_2 / \text{CH}_2\text{-CH=CH}$               | C-7, C-12 / FA- $\text{CH}_2$ |
| 2.0192 | C / CE / FA | $\text{CH}_2 / \text{CH}_2\text{-CH=CH}$               | C-7, C-12 / FA- $\text{CH}_2$ |
| 2.0262 | C / CE / FA | $\text{CH}_2 / \text{CH}_2\text{-CH=CH}$               | C-7, C-12 / FA- $\text{CH}_2$ |
| 2.0407 | C / CE / FA | $\text{CH}_2 / \text{CH}_2\text{-CH=CH}$               | C-7, C-12 / FA- $\text{CH}_2$ |
| 2.0673 | FA          | $\text{CH=CH-CH}_2\text{-CH}_2\text{-CH}_2\text{-COO}$ | FA- $\text{CH}_2$             |
| 2.0770 | FA          | $\text{CH=CH-CH}_2\text{-CH}_2\text{-CH}_2\text{-COO}$ | FA- $\text{CH}_2$             |
| 2.0993 | FA          | $\text{CH=CH-CH}_2\text{-CH}_2\text{-CH}_2\text{-COO}$ | FA- $\text{CH}_2$             |
| 2.1266 | FA          | $\text{CH=CH-CH}_2\text{-CH}_2\text{-CH}_2\text{-COO}$ | FA- $\text{CH}_2$             |
| 2.1383 | FA          | $\text{CH=CH-CH}_2\text{-CH}_2\text{-CH}_2\text{-COO}$ | FA- $\text{CH}_2$             |
| 2.1662 | FA          | $\text{CH=CH-CH}_2\text{-CH}_2\text{-CH}_2\text{-COO}$ | FA- $\text{CH}_2$             |
| 2.1798 | FA          | $\text{CH=CH-CH}_2\text{-CH}_2\text{-CH}_2\text{-COO}$ | FA- $\text{CH}_2$             |
| 2.1923 | FA          | $\text{CH=CH-CH}_2\text{-CH}_2\text{-CH}_2\text{-COO}$ | FA- $\text{CH}_2$             |
| 2.2028 | C           | $\text{CH}_2$                                          | C-4                           |
| 2.2262 | C           | $\text{CH}_2$                                          | C-4                           |
| 2.2388 | C           | $\text{CH}_2$                                          | C-4                           |
| 2.2431 | C           | $\text{CH}_2$                                          | C-4                           |
| 2.2471 | C           | $\text{CH}_2$                                          | C-4                           |
| 2.2505 | C           | $\text{CH}_2$                                          | C-4                           |
| 2.2542 | C           | $\text{CH}_2$                                          | C-4                           |
| 2.2602 | C / CE / FA | $\text{CH}_2 / \text{CH}_2\text{-COO}$                 | C-4, FA- $\text{CH}_2$        |
| 2.2620 | C / CE / FA | $\text{CH}_2 / \text{CH}_2\text{-COO}$                 | C-4, FA- $\text{CH}_2$        |
| 2.2716 | C / CE / FA | $\text{CH}_2 / \text{CH}_2\text{-COO}$                 | C-4, FA- $\text{CH}_2$        |
| 2.2776 | C / CE / FA | $\text{CH}_2 / \text{CH}_2\text{-COO}$                 | C-4, FA- $\text{CH}_2$        |
| 2.2826 | C / CE / FA | $\text{CH}_2 / \text{CH}_2\text{-COO}$                 | C-4, FA- $\text{CH}_2$        |
| 2.2950 | CE / FA     | $\text{CH}_2\text{-COO}$                               | FA- $\text{CH}_2$             |
| 2.3072 | CE / FA     | $\text{CH}_2\text{-COO}$                               | FA- $\text{CH}_2$             |
| 2.3188 | CE / FA     | $\text{CH}_2 / \text{CH}_2\text{-COO}$                 | C-4, FA- $\text{CH}_2$        |
| 2.3275 | CE / FA     | $\text{CH}_2 / \text{CH}_2\text{-COO}$                 | C-4, FA- $\text{CH}_2$        |
| 2.3295 | CE / FA     | $\text{CH}_2 / \text{CH}_2\text{-COO}$                 | C-4, FA- $\text{CH}_2$        |
| 2.3323 | CE / FA     | $\text{CH}_2 / \text{CH}_2\text{-COO}$                 | C-4, FA- $\text{CH}_2$        |
| 2.3386 | CE / FA     | $\text{CH}_2 / \text{CH}_2\text{-COO}$                 | C-4, FA- $\text{CH}_2$        |
| 2.3417 | CE / FA     | $\text{CH}_2 / \text{CH}_2\text{-COO}$                 | C-4, FA- $\text{CH}_2$        |
| 2.3450 | CE / FA     | $\text{CH}_2 / \text{CH}_2\text{-COO}$                 | C-4, FA- $\text{CH}_2$        |
| 2.3496 | CE / FA     | $\text{CH}_2 / \text{CH}_2\text{-COO}$                 | C-4, FA- $\text{CH}_2$        |
| 2.3518 | CE / FA     | $\text{CH}_2 / \text{CH}_2\text{-COO}$                 | C-4, FA- $\text{CH}_2$        |
| 2.3574 | CE / FA     | $\text{CH}_2 / \text{CH}_2\text{-COO}$                 | C-4, FA- $\text{CH}_2$        |
| 2.3586 | CE / FA     | $\text{CH}_2 / \text{CH}_2\text{-COO}$                 | C-4, FA- $\text{CH}_2$        |
| 2.3620 | CE / FA     | $\text{CH}_2 / \text{CH}_2\text{-COO}$                 | C-4, FA- $\text{CH}_2$        |
| 2.4125 | FA          | $\text{CH=CH-CH}_2\text{-CH}_2\text{-COO}$             | FA- $\text{CH}_2$             |
| 2.7688 | FA          | $\text{CH=CH-CH}_2\text{-CH=CH}$                       | FA- $\text{CH}_2$             |
| 2.7800 | FA          | $\text{CH=CH-CH}_2\text{-CH=CH}$                       | FA- $\text{CH}_2$             |
| 2.7916 | FA          | $\text{CH=CH-CH}_2\text{-CH=CH}$                       | FA- $\text{CH}_2$             |
| 2.8147 | FA          | $\text{CH=CH-(CH}_2\text{-CH=CH-)}_x$                  | FA- $\text{CH}_2$             |
| 2.8231 | FA          | $\text{CH=CH-(CH}_2\text{-CH=CH-)}_x$                  | FA- $\text{CH}_2$             |
| 2.8341 | FA          | $\text{CH=CH-(CH}_2\text{-CH=CH-)}_x$                  | FA- $\text{CH}_2$             |
| 2.8411 | FA          | $\text{CH=CH-(CH}_2\text{-CH=CH-)}_x$                  | FA- $\text{CH}_2$             |
| 2.8514 | FA          | $\text{CH=CH-(CH}_2\text{-CH=CH-)}_x$                  | FA- $\text{CH}_2$             |

|        |          |                                                            |                                                                                                                               |
|--------|----------|------------------------------------------------------------|-------------------------------------------------------------------------------------------------------------------------------|
| 2.8607 | FA       | $\text{CH}=\text{CH}-(\text{CH}_2-\text{CH}=\text{CH}-)_x$ | FA- $\text{CH}_2$                                                                                                             |
| 2.8682 | FA       | $\text{CH}=\text{CH}-(\text{CH}_2-\text{CH}=\text{CH}-)_x$ | FA- $\text{CH}_2$                                                                                                             |
| 3.0919 | PE       | $\text{CH}_2$                                              | PE-2'                                                                                                                         |
| 3.1026 | PE       | $\text{CH}_2$                                              | PE-2'                                                                                                                         |
| 3.1099 | PE       | $\text{CH}_2$                                              | PE-2'                                                                                                                         |
| 3.2140 | SM       | $\text{N}^+(\text{CH}_3)_3$                                | SM- $\text{CH}_3$                                                                                                             |
| 3.2246 | PC       | $\text{N}^+(\text{CH}_3)_3$                                | PC- $\text{CH}_3$                                                                                                             |
| 3.4402 | C / MeOH | CHOH                                                       | C-3                                                                                                                           |
| 3.4485 | C / MeOH | CHOH                                                       | C-3                                                                                                                           |
| 3.4590 | C / MeOH | CHOH                                                       | C-3                                                                                                                           |
| 3.4669 | C / MeOH | CHOH                                                       | C-3                                                                                                                           |
| 3.4748 | C / MeOH | CHOH                                                       | C-3                                                                                                                           |
| 3.4853 | C / MeOH | CHOH                                                       | C-3                                                                                                                           |
| 3.4936 | C / MeOH | CHOH                                                       | C-3                                                                                                                           |
| 3.5974 | Choline  | $\text{CH}_2$                                              | PC-2'                                                                                                                         |
| 3.6038 | Choline  | $\text{CH}_2$                                              | PC-2'                                                                                                                         |
| 3.6125 | Choline  | $\text{CH}_2$                                              | PC-2'                                                                                                                         |
| 3.7616 | PI       | CH                                                         | PI-6'                                                                                                                         |
| 3.7772 | PI       | CH                                                         | PI-6'                                                                                                                         |
| 3.7938 | PI       | CH                                                         | PI-6'                                                                                                                         |
| 3.8684 | HG       | CH, $\text{CH}_2$                                          | PLA-1 <sup>d</sup> ,1 <sup>u</sup> , CAR-1',2',3', SPH-2,3 <sup>u</sup> , PI,1'                                               |
| 3.8727 | HG       | CH, $\text{CH}_2$                                          | PLA-1 <sup>d</sup> ,1 <sup>u</sup> , CAR-1',2',3', SPH-2,3 <sup>u</sup> , PI,1'                                               |
| 3.8791 | HG       | CH, $\text{CH}_2$                                          | PLA-1 <sup>d</sup> ,1 <sup>u</sup> , CAR-1',2',3', SPH-2,3 <sup>u</sup> , PI,1'                                               |
| 3.8847 | HG       | CH, $\text{CH}_2$                                          | PLA-1 <sup>d</sup> ,1 <sup>u</sup> , CAR-1',2',3', SPH-2,3 <sup>u</sup> , PI,1'                                               |
| 3.8907 | HG       | CH, $\text{CH}_2$                                          | PLA-1 <sup>d</sup> ,1 <sup>u</sup> , CAR-1',2',3', SPH-2,3 <sup>u</sup> , PI,1'                                               |
| 3.8963 | HG       | CH, $\text{CH}_2$                                          | PLA-1 <sup>d</sup> ,1 <sup>u</sup> , CAR-1',2',3', SPH-2,3 <sup>u</sup> , PI,1'                                               |
| 3.9015 | HG       | CH, $\text{CH}_2$                                          | PLA-1 <sup>d</sup> ,1 <sup>u</sup> , CAR-1',2',3', SPH-2,3 <sup>u</sup> , PI,1'                                               |
| 3.9118 | HG       | CH, $\text{CH}_2$                                          | PLA-1 <sup>d</sup> ,1 <sup>u</sup> , CAR-1',2',3', SPH-2,3 <sup>u</sup> , PI,1'                                               |
| 3.9174 | HG       | CH, $\text{CH}_2$                                          | PLA-1 <sup>d</sup> ,1 <sup>u</sup> , CAR-1',2',3', SPH-2,3 <sup>u</sup> , PI,1'                                               |
| 3.9251 | HG       | CH, $\text{CH}_2$                                          | PLA-1 <sup>d</sup> ,1 <sup>u</sup> , CAR-1',2',3', SPH-2,3 <sup>u</sup> , PI,1'                                               |
| 3.9316 | HG       | CH, $\text{CH}_2$                                          | PLA-1 <sup>d</sup> ,1 <sup>u</sup> , CAR-1',2',3', SPH-2,3 <sup>u</sup> , PI,1'                                               |
| 3.9389 | HG       | CH, $\text{CH}_2$                                          | PLA-1 <sup>d</sup> ,1 <sup>u</sup> , CAR-1',2',3', SPH-2,3 <sup>u</sup> , PI,1'                                               |
| 3.9932 | HG       | $\text{CH}_2$                                              | PLA-3, PC-3, PE-3                                                                                                             |
| 4.0038 | HG       | $\text{CH}_2$                                              | PLA-3, PC-3, PE-3                                                                                                             |
| 4.0139 | HG       | $\text{CH}_2$                                              | PLA-3, PC-3, PE-3                                                                                                             |
| 4.1467 | HG       | $\text{CH}_2$                                              | PI-1 <sup>u</sup> , PC-1 <sup>u</sup> , PE-1 <sup>u</sup> , PI-1', TG-1 <sup>u</sup> , DG-1 <sup>u</sup> , SPH-3 <sup>d</sup> |
| 4.1579 | HG       | $\text{CH}_2$                                              | PI-1 <sup>u</sup> , PC-1 <sup>u</sup> , PE-1 <sup>u</sup> , PI-1', TG-1 <sup>u</sup> , DG-1 <sup>u</sup> , SPH-3 <sup>d</sup> |
| 4.1672 | HG       | $\text{CH}_2$                                              | PI-1 <sup>u</sup> , PC-1 <sup>u</sup> , PE-1 <sup>u</sup> , PI-1', TG-1 <sup>u</sup> , DG-1 <sup>u</sup> , SPH-3 <sup>d</sup> |
| 4.1778 | HG       | $\text{CH}_2$                                              | PI-1 <sup>u</sup> , PC-1 <sup>u</sup> , PE-1 <sup>u</sup> , PI-1', TG-1 <sup>u</sup> , DG-1 <sup>u</sup> , SPH-3 <sup>d</sup> |
| 4.1871 | HG       | $\text{CH}_2$                                              | PI-1 <sup>u</sup> , PC-1 <sup>u</sup> , PE-1 <sup>u</sup> , PI-1', TG-1 <sup>u</sup> , DG-1 <sup>u</sup> , SPH-3 <sup>d</sup> |
| 4.2511 | Choline  | $\text{CH}_2$                                              | PC-1'                                                                                                                         |
| 4.3243 | TG       | $\text{CH}_2$                                              | TG-1 <sup>d</sup>                                                                                                             |
| 4.3310 | TG       | $\text{CH}_2$                                              | TG-1 <sup>d</sup>                                                                                                             |
| 4.3439 | TG / DG  | $\text{CH}_2$                                              | TG-1 <sup>d</sup> , DG-1 <sup>d</sup>                                                                                         |
| 4.3508 | TG / DG  | $\text{CH}_2$                                              | TG-1 <sup>d</sup> , DG-1 <sup>d</sup>                                                                                         |
| 4.3615 | PLA      | $-\text{CH}_2-\text{CH}=\text{CH}-\text{O}-$               | PLA-b                                                                                                                         |
| 4.3713 | PLA      | $-\text{CH}_2-\text{CH}=\text{CH}-\text{O}-$               | PLA-b                                                                                                                         |
| 4.4156 | HG       | $\text{CH}_2$                                              | PC-1 <sup>d</sup> , PE-1 <sup>d</sup> , PI-1 <sup>d</sup>                                                                     |

|        |           |                                    |                                                           |
|--------|-----------|------------------------------------|-----------------------------------------------------------|
| 4.4206 | HG        | <b>CH<sub>2</sub></b>              | PC-1 <sup>d</sup> , PE-1 <sup>d</sup> , PI-1 <sup>d</sup> |
| 4.4354 | HG        | <b>CH<sub>2</sub></b>              | PC-1 <sup>d</sup> , PE-1 <sup>d</sup> , PI-1 <sup>d</sup> |
| 4.4407 | HG        | <b>CH<sub>2</sub></b>              | PC-1 <sup>d</sup> , PE-1 <sup>d</sup> , PI-1 <sup>d</sup> |
| 4.5716 | CE / MeOH | <b>CHOR</b>                        | C-3                                                       |
| 4.5788 | CE / MeOH | <b>CHOR</b>                        | C-3                                                       |
| 4.5898 | CE / MeOH | <b>CHOR</b>                        | C-3                                                       |
| 4.5993 | CE / MeOH | <b>CHOR</b>                        | C-3                                                       |
| 4.6078 | CE / MeOH | <b>CHOR</b>                        | C-3                                                       |
| 4.6169 | CE / MeOH | <b>CHOR</b>                        | C-3                                                       |
| 4.6260 | CE / MeOH | <b>CHOR</b>                        | C-3                                                       |
| 5.2225 | HG        | <b>CH</b>                          | PC-2, PE-2, PI-2                                          |
| 5.2279 | HG        | <b>CH</b>                          | PC-2, PE-2, PI-2                                          |
| 5.2324 | HG        | <b>CH</b>                          | PC-2, PE-2, PI-2                                          |
| 5.2374 | HG        | <b>CH</b>                          | PC-2, PE-2, PI-2                                          |
| 5.2431 | HG        | <b>CH</b>                          | PC-2, PE-2, PI-2                                          |
| 5.2485 | HG        | <b>CH</b>                          | PC-2, PE-2, PI-2                                          |
| 5.2521 | HG        | <b>CH</b>                          | PC-2, PE-2, PI-2                                          |
| 5.2577 | HG        | <b>CH</b>                          | PC-2, PE-2, PI-2                                          |
| 5.2764 | TG        | <b>CH</b>                          | TG-2                                                      |
| 5.2845 | TG        | <b>CH</b>                          | TG-2                                                      |
| 5.2925 | TG        | <b>CH</b>                          | TG-2                                                      |
| 5.3086 | FA        | <b>CH=CH</b>                       | FA-CH                                                     |
| 5.3205 | FA        | <b>CH=CH</b>                       | FA-CH                                                     |
| 5.3268 | FA        | <b>CH=CH</b>                       | FA-CH                                                     |
| 5.3389 | C / FA    | <b>CH, CH=CH</b>                   | C-6, FA-CH                                                |
| 5.3448 | C / FA    | <b>CH, CH=CH</b>                   | C-6, FA-CH                                                |
| 5.3494 | C / FA    | <b>CH, CH=CH</b>                   | C-6, FA-CH                                                |
| 5.3543 | C / FA    | <b>CH, CH=CH</b>                   | C-6, FA-CH                                                |
| 5.3625 | FA        | <b>CH=CH</b>                       | FA-CH                                                     |
| 5.3680 | FA        | <b>CH=CH</b>                       | FA-CH                                                     |
| 5.3780 | CE / FA   | <b>CH, CH=CH</b>                   | C-6, FA-CH                                                |
| 5.3848 | CE / FA   | <b>CH, CH=CH</b>                   | C-6, FA-CH                                                |
| 5.3923 | CE / FA   | <b>CH, CH=CH</b>                   | C-6, FA-CH                                                |
| 5.4049 | FA        | <b>CH=CH</b>                       | FA-CH                                                     |
| 5.4423 | SM        | <b>-CH<sub>2</sub>-CH=CH-CHOH-</b> | SPH-a                                                     |
| 5.4550 | SM        | <b>-CH<sub>2</sub>-CH=CH-CHOH-</b> | SPH-a                                                     |
| 5.4683 | SM        | <b>-CH<sub>2</sub>-CH=CH-CHOH-</b> | SPH-a                                                     |
| 5.6887 | SM        | <b>-CH<sub>2</sub>-CH=CH-CHOH-</b> | SPH-b                                                     |
| 5.7011 | SM        | <b>-CH<sub>2</sub>-CH=CH-CHOH-</b> | SPH-b                                                     |
| 5.7129 | SM        | <b>-CH<sub>2</sub>-CH=CH-CHOH-</b> | SPH-b                                                     |
| 5.7259 | SM        | <b>-CH<sub>2</sub>-CH=CH-CHOH-</b> | SPH-b                                                     |
| 5.7383 | SM        | <b>-CH<sub>2</sub>-CH=CH-CHOH-</b> | SPH-b                                                     |
| 5.9181 | PLA       | <b>-CH<sub>2</sub>-CH=CH-O-</b>    | PLA-a                                                     |
| 5.9279 | PLA       | <b>-CH<sub>2</sub>-CH=CH-O-</b>    | PLA-a                                                     |

<sup>a</sup>Samples were contained in a mixture of CDCl<sub>3</sub>/methanol-d<sub>4</sub> (2:1, by volume). In addition, 0.03 vol% tetramethylsilane (TMS) and 14.11 mM pyrazine was added as reference. The spectra were recorded at 293 K at 600.12 MHz and referenced to internal TMS. For obtaining approximate chemical shifts relative to DSS in D<sub>2</sub>O a value of 0.074 ppm has to be added to the given values (see Materials

and Methods). However, the size of the particles also determine the chemical shifts. In serum at high DSS concentrations (32 mM) the mean position of the cholesterol C18 signal is 0.722 ppm. With the above correction the mean size dependent shift would be -0.05 ppm. C, cholesterol; CAR, cardiolipin; CE, cholesterol ester; DG; diacylglycerol; FA, fatty acid; HG, head group; MeOH, methanol; PC, phosphatidylcholine; PE, phosphatidylethanolamine; PI, phosphatidylinositol; PLA, plasmalogen; SM, sphingomyelin; SPH, sphingosine; TG, triacylglycerol. The CH protons of the sphingosine and plasmalogene double bonds are designated as a (next to head group) and b (next to alkyl chain). The diastereotopic CH<sub>2</sub> protons with two separated signals are designated as u (upfield) and d (downfield). Note, that the signal positions of the resolved multiplet components are given.

**Supplemental Table S2: T<sub>1</sub> relaxations times of internal standards and selected functional groups of lipids.<sup>a</sup>**

|                       | Pyrazine                  | TMS                                   | DSS                                   | Choline                                | Fatty acid                                                    | Fatty acid              | Fatty acid             | Cholesterol                         |
|-----------------------|---------------------------|---------------------------------------|---------------------------------------|----------------------------------------|---------------------------------------------------------------|-------------------------|------------------------|-------------------------------------|
|                       | <b>-(CH)</b> <sub>4</sub> | <b>-(CH<sub>3</sub>)</b> <sub>4</sub> | <b>-(CH<sub>3</sub>)</b> <sub>3</sub> | <b>-N(CH<sub>3</sub>)</b> <sub>3</sub> | <b>-(CH=CH)</b><br><b>-CH<sub>2</sub>-</b><br><b>(CH=CH)-</b> | <b>acid</b>             | <b>acid</b>            | <b>-C<sup>18</sup>H<sub>3</sub></b> |
|                       |                           |                                       |                                       |                                        |                                                               | <b>-CH<sub>2</sub>-</b> | <b>-CH<sub>3</sub></b> |                                     |
| <b>Lipid extracts</b> |                           |                                       |                                       |                                        |                                                               |                         |                        |                                     |
| δ [ppm]               | 8.636                     | 0.00                                  | -                                     | 3.202                                  | 2.779                                                         | 1.260                   | 0.883                  | 0.688                               |
| T <sub>1</sub> [s]    | 6.85                      | 5.65                                  | -                                     | 0.82                                   | 1.54                                                          | 1.26                    | 3.16                   | 0.85                                |
| <b>Serum</b>          |                           |                                       |                                       |                                        |                                                               |                         |                        |                                     |
| δ [ppm]               | 8.642                     | -                                     | 0.00 <sup>b</sup>                     | 3.247                                  | 2.759                                                         | 1.306                   | 0.893                  | 0.67                                |
| T <sub>1</sub> [s]    | 9.66                      | -                                     | 3.95                                  | 0.39                                   | 0.47                                                          | 0.43                    | 0.55                   | 0.48                                |
| <b>HDL</b>            |                           |                                       |                                       |                                        |                                                               |                         |                        |                                     |
| δ [ppm]               | -                         | -                                     | -                                     | 3.209                                  | 2.697                                                         | 1.220                   | 0.829                  | 0.644                               |
| T <sub>1</sub> [s]    | -                         | -                                     | -                                     | 0.53                                   | 0.59                                                          | 0.56                    | 0.76                   | 0.64                                |

<sup>a</sup>The protons observed are given in bold letters. 600 MHz spectra of lipid extracts were measured at 293 K, of serum and HDL at 310 K. The serum and the HDL sample were from different patients.

<sup>b</sup>Note that the DSS signal shifts with its concentration, at 0.1 mM DSS it is located at -0.029 ppm.

**Supplemental Table S3. T<sub>1</sub> relaxations times of internal standards at different temperatures in human blood serum.<sup>a</sup>**

| T [K] | <b>Pyrazine</b><br>-( <b>CH</b> ) <sub>4</sub> | <b>Dioxane</b><br>-( <b>CH</b> ) <sub>4</sub> | <b>DSS</b><br>-( <b>CH</b> ) <sub>3</sub> |
|-------|------------------------------------------------|-----------------------------------------------|-------------------------------------------|
|       | T <sub>1</sub> [s]                             |                                               |                                           |
| 283   | 5.44                                           | 3.30                                          | 2.23                                      |
| 293   | 6.92                                           | 4.11                                          | 278                                       |
| 303   | 8.55                                           | 4.97                                          | 3.54                                      |
| 310   | 9.66                                           | 5.63                                          | 3.95                                      |
| 313   | 10.20                                          | 5.91                                          | 3.98                                      |
| 323   | 12.36                                          | 7.02                                          | 4.81                                      |

<sup>a</sup> T<sub>1</sub> relaxation times were measured at 600 MHz. The protons observed are given in bold letters.

**Supplemental Table S4. NMR signals usable for a quantitative analysis of lipids in NMR spectra of extracts<sup>a</sup>**

| Mean position [ppm] | Integration range [ppm] | Group                                                                                                       | Application                                                                                                   |
|---------------------|-------------------------|-------------------------------------------------------------------------------------------------------------|---------------------------------------------------------------------------------------------------------------|
| 0.641               | 0.550 - 0.732           | C, CE (C-18)                                                                                                | Total cholesterol (C <sub>M</sub> )                                                                           |
| 0.841               | 0.732 - 0.949           | C, CE (C-21, C-26, C-27),<br>FA (- <b>CH</b> <sub>3</sub> )                                                 | CH <sub>3</sub> -groups of cholesterol, fatty acids of CE, TG, PL, SL, PLA, and of side chains of SL and PLA. |
| 1.011               | 0.996 - 1.026           | C (C-19)                                                                                                    | Cholesterol (C <sub>M</sub> )                                                                                 |
| 1.042               | 1.026 - 1.057           | CE (C-19)                                                                                                   | Cholesterol esters (C <sub>M</sub> )                                                                          |
| 1.320               | 1.216 - 1.424           | C, CE (C-16, C-20, C-22, C-23),<br>FA (- <b>CH</b> <sub>2</sub> -)                                          | Estimation of mean fatty acid chain length                                                                    |
| 1.663               | 1.552 - 1.672           | C, CE (C-7, C-8, C-11, C-15, C-25),<br>FA (- <b>CH</b> <sub>2</sub> -CH <sub>2</sub> -COO-)                 | Total fatty acid residues (C <sub>M</sub> )                                                                   |
| 2.092               | 1.949 - 2.235           | C (C-4), FA (- <b>CH</b> <sub>2</sub> -CH=CH-)                                                              | Double bounds of fatty acid residues (control)                                                                |
| 2.339               | 2.236 - 2.389           | C, CE (C-4) / FA (- <b>CH</b> <sub>2</sub> -COO-)                                                           | Total fatty acid residues (control)                                                                           |
| 2.761               | 2.720 - 2.801           | FA (-CH=CH- <b>CH</b> <sub>2</sub> -CH=CH-)                                                                 | Estimation of polyunsaturated fatty acid ratio (diunsaturated:polyunsaturated)                                |
| 2.823               | 2.721 - 2.926           | FA (-CH=CH-( <b>CH</b> <sub>2</sub> -CH=CH-) <sub>x</sub> ),<br>FA (-CH=CH- <b>CH</b> <sub>2</sub> -CH=CH-) | Estimation of polyunsaturated fatty acid ratio (diunsaturated:polyunsaturated)                                |

|       |               |                                                                                                                         |                                                                                |
|-------|---------------|-------------------------------------------------------------------------------------------------------------------------|--------------------------------------------------------------------------------|
| 2.864 | 2.801 - 2.927 | FA (-CH=CH-( <u>CH</u> <sub>2</sub> -CH=CH-) <sub>x</sub> )                                                             | Estimation of polyunsaturated fatty acid ratio (diunsaturated:polyunsaturated) |
| 3.102 | 3.070 - 3.133 | PE (PE-2')                                                                                                              | Ethanolamine head group, concentration of PE (C <sub>M</sub> )                 |
| 3.224 | 3.194 - 3.255 | SM (-Choline), PC (-Choline), MeOH- <sup>13</sup> C-Satellite                                                           | Choline head group of mainly PC and SM (C <sub>M</sub> )                       |
| 3.468 | 3.422 - 3.513 | MeOH- <sup>13</sup> C-Satellite, C (C-3)                                                                                | Used for quantification and correction of MeOH- <sup>13</sup> C-Satellite      |
| 3.598 | 3.567 - 3.629 | PC (PC-2'), PI (PI-4')                                                                                                  | PC and PI (control)                                                            |
| 3.778 | 3.737 - 3.819 | PI (PI-6')                                                                                                              | Inositol head group of PI (C <sub>M</sub> )                                    |
| 4.171 | 4.141 - 4.200 | PI (PI-1 <sup>u</sup> , PI-1'), PC (PC-1 <sup>u</sup> ), PE (PE-1 <sup>u</sup> ), TG (TG-1 <sup>u</sup> ), SPH (SPH-3d) | PI, PC, PE, TG and SPH (control)                                               |
| 4.256 | 4.217 - 4.295 | PC (PC-1')                                                                                                              | Choline head group (PC/SM) (control)                                           |
| 4.341 | 4.302 - 4.380 | TG (TG-1 <sup>d</sup> )                                                                                                 | Triacylglyceride (TG)                                                          |
| 5.233 | 5.200 - 5.266 | PC (PC-2), PE (PE-2), PI (PI-2)                                                                                         | PC, PE and PI (control)                                                        |
| 5.283 | 5.266 - 5.300 | TG (TG-2)                                                                                                               | TG (control)                                                                   |
| 5.296 | 5.042 - 5.551 | C, CE (C-1), FA (-CH=CH-), PC (PC-2), PE (PE-2), PI (PI-2)                                                              | Estimation of fatty acid saturation degree                                     |
| 5.466 | 5.436 - 5.496 | SL (SPH-a)                                                                                                              | Sphingosine (control)                                                          |
| 5.720 | 5.682 - 5.758 | SL (SPH-b)                                                                                                              | Sphingosine (C <sub>M</sub> )                                                  |
| 5.921 | 5.887 - 5.955 | PLA (PLA-a)                                                                                                             | Plasmalogene (C <sub>M</sub> )                                                 |

<sup>a</sup>The diastereotopic CH<sub>2</sub> protons with two separated signals are designated as u (upfield) and d (downfield). The CH protons of the shingosine and plasmalogene double bonds are designated as a (next to head group) and b (next to alkyl chain). (C<sub>M</sub>) useful for calculation of the molar concentration. C = Total Cholesterol, CE = Cholesterol ester, FA = Fatty acid, TG = Triacylglyceride, PC = Phosphatidylcholine, PE = Phosphatidylethanolamine, PI = Phosphatidylinositol, PLA = Plasmalogene, SL = Sphingolipids, SM = Sphingomyelin, SPH = Sphingosine.

**Supplemental Table S5. Distribution of fatty acid species in different lipoprotein samples<sup>a</sup>**

| Fatty acid                       | Serum | VLDL | IDL  | LDL  | HDL2 | HDL3 |
|----------------------------------|-------|------|------|------|------|------|
| Relative molar concentration [%] |       |      |      |      |      |      |
| 16:0                             | 24.0  | 33.1 | 29.6 | 21.9 | 27.3 | 33.3 |



|      |      |      |      |      |      |      |
|------|------|------|------|------|------|------|
| 18:0 | 7.7  | 7.2  | 11.5 | 8.8  | 9.1  | 11.6 |
| 20:0 | 0.0  | 0.0  | 2.7  | 1.8  | 2.1  | 0.7  |
| 22:0 | 0.0  | 0.0  | 1.6  | 2.9  | 3.0  | 1.6  |
| 24:0 | 0.0  | 0.0  | 0.0  | 3.9  | 4.0  | 2.1  |
| 18:1 | 16.1 | 27.1 | 11.4 | 6.8  | 4.8  | 1.9  |
| 24:1 | 8.0  | 1.4  | 2.3  | 5.6  | 2.6  | 0.2  |
| 18:2 | 31.9 | 22.8 | 30.3 | 37.0 | 34.4 | 33.6 |
| 20:3 | 3.0  | 2.6  | 2.8  | 2.0  | 0.2  | 0.4  |
| 20:4 | 5.1  | 2.5  | 2.8  | 2.7  | 1.0  | 2.5  |
| 20:5 | 2.8  | 1.9  | 2.2  | 2.6  | 4.7  | 6.4  |
| 22:5 | 0.6  | 0.9  | 2.9  | 4.1  | 7.2  | 5.7  |
| 22:6 | 0.8  | 0.5  | 0.0  | 0.0  | 0.1  | 0.0  |

<sup>a</sup>The distribution was obtained by a multidimensional of the NMR spectra of lipoprotein extracts assuming a continuous length distribution.

## Figures

**Supplemental Figure S1. Effect of freezing and thawing on <sup>1</sup>H NMR spectra of human blood serum.** 600 MHz 1D-NOESY spectra of human blood serum. (from top to bottom) fresh sample, sample after freezing, storing at 253 K for 5 h and thawing, sample after four freezing-thawing cycles, difference between first and last spectrum.

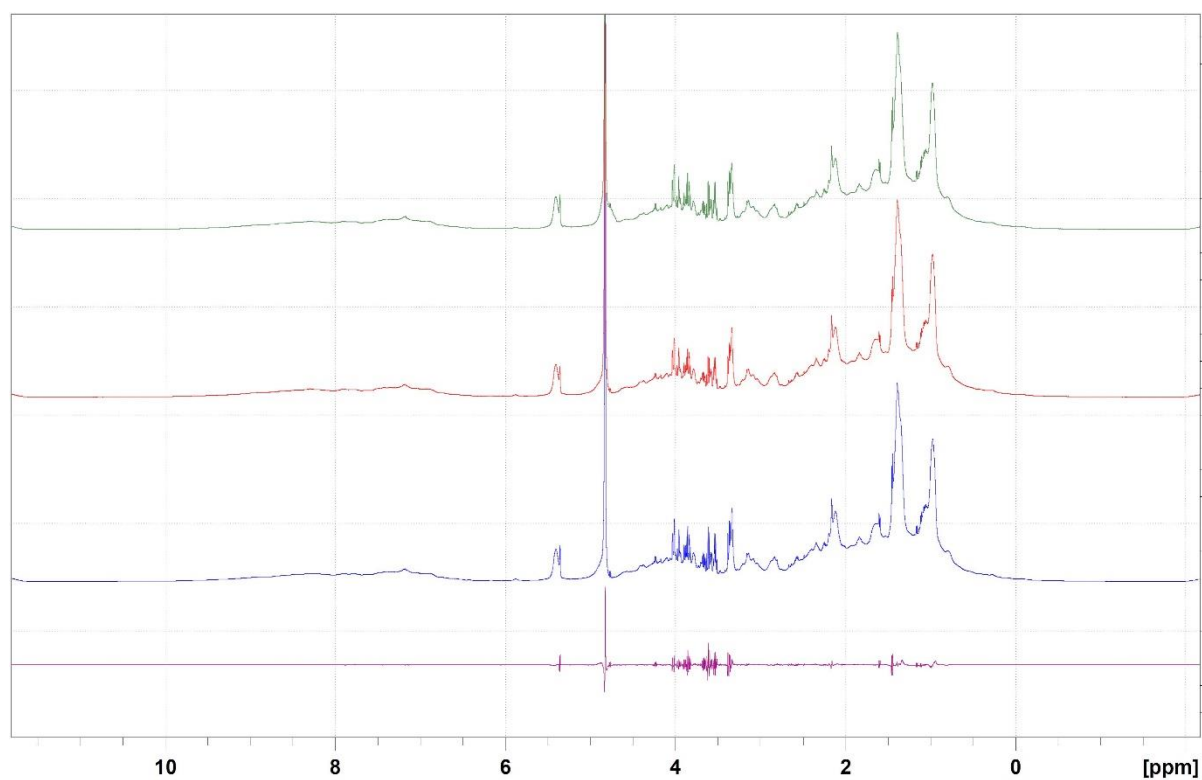



**Supplemental Figure S2. Effect of freezing and thawing on  $^1\text{H}$  NMR spectra of the proteins of human blood serum.** 600 MHz 1D-NOESY spectra of human blood serum, downfield part of the spectra shown in Fig. S1 scaled up 6-times. (from top to bottom) fresh sample, sample after freezing, storing at 253 K for 5 h and thawing, sample after four freezing-thawing cycles, difference between first and last spectrum.

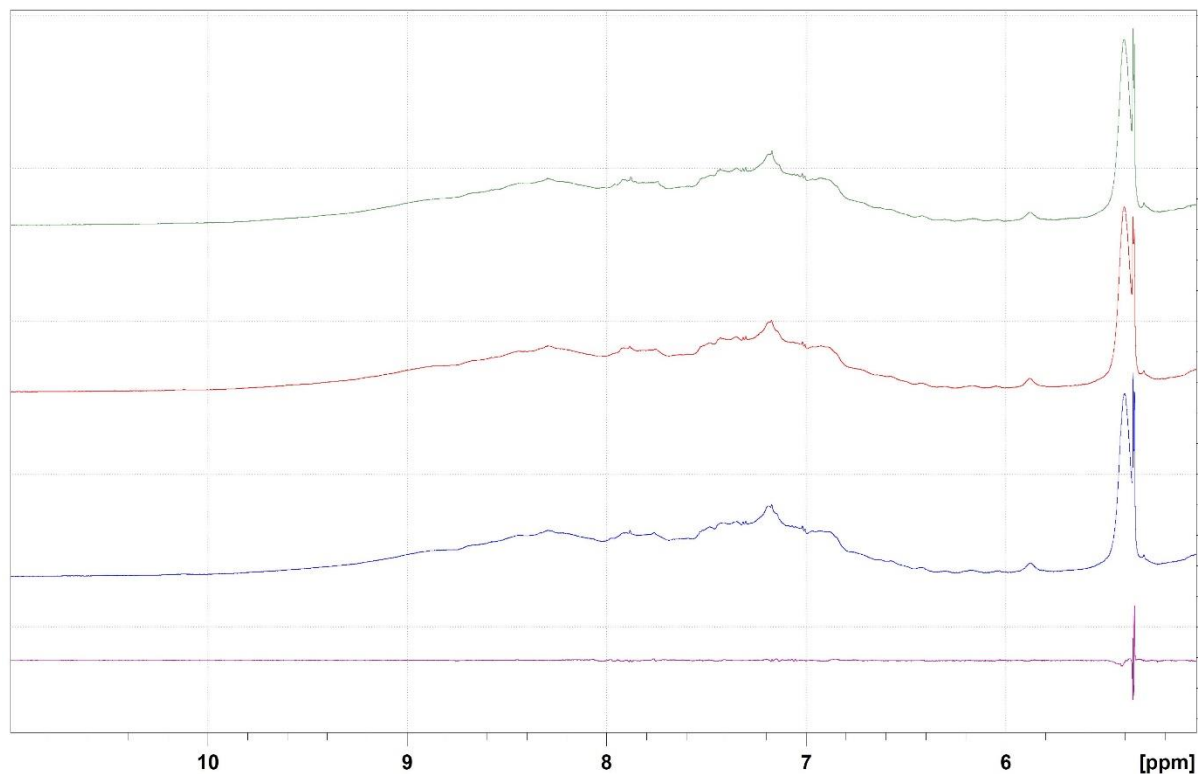

**Supplemental Figure S3. Overlay of the 600 MHz  $^1\text{H}$  NMR spectra of chloroform-methanol extracts of different lipoprotein fractions.** The different lipoprotein fractions obtained by analytical ultracentrifugation and shown in Fig. 2 were extracted with perdeutero chloroform and perdeutero methanol (2:1) as described in Materials and Methods. 600 MHz  $^1\text{H}$  NMR spectra, 293 K, reference TMS.

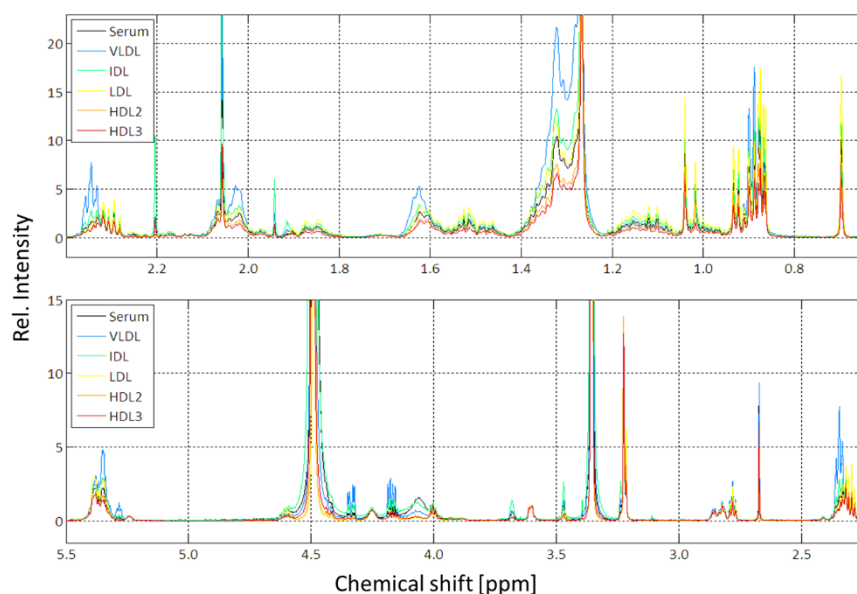

**Supplemental Figure S4: Identification of lipid components of LDL extracts.** 600 MHz  $^1\text{H}$  NMR spectra of LDL extracted as described in Materials and Methods. Temperature 293 K, mixing time 60 ms. The signals of deuterio methanol and chloroform were reduced by suitable processing. (Top, left) signals of fatty acids. (Top, right) signals of cholesterol and cholesterol esters. (Bottom, left) signals of sphingosine. (Bottom, right) signals of choline, glycerol in phosphoglycerides and triacylglycerols. For assignments see Supplemental Table S1.

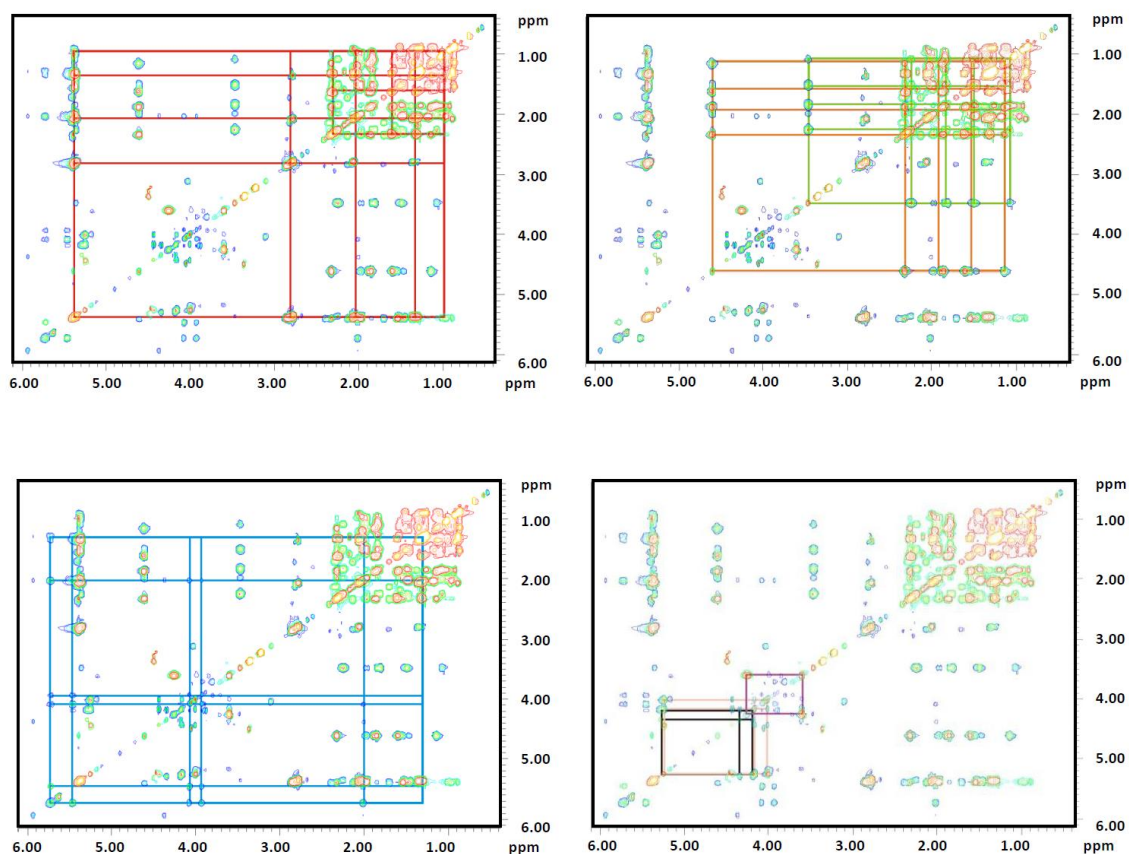

**Supplemental Figure S5.  $^1\text{H}$  NMR spectra of a chloroform-methanol extract of HDL3.** HDL3 was obtained by analytical ultracentrifugation and extracted with perdeutero chloroform and perdeutero methanol (2:1) as described in Materials and Methods. 600 MHz  $^1\text{H}$  NMR spectra, 293 K, reference TMS. The integration ranges of Table S4 are indicated.

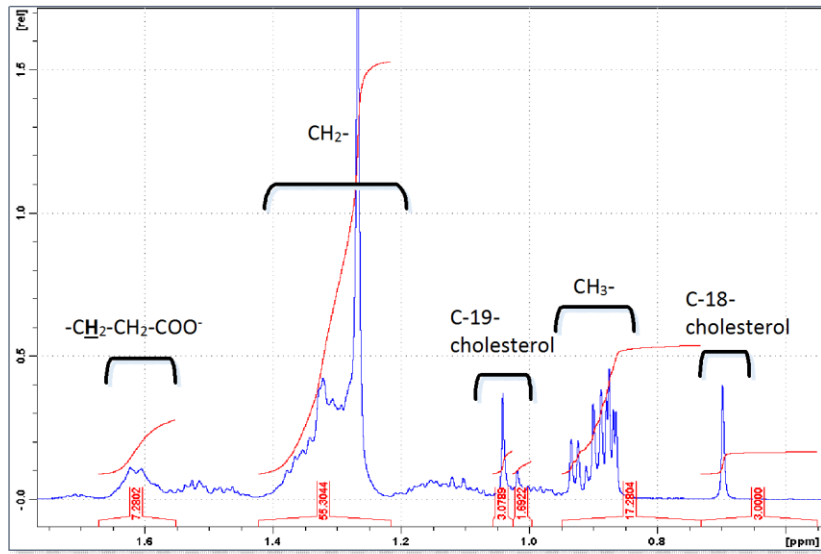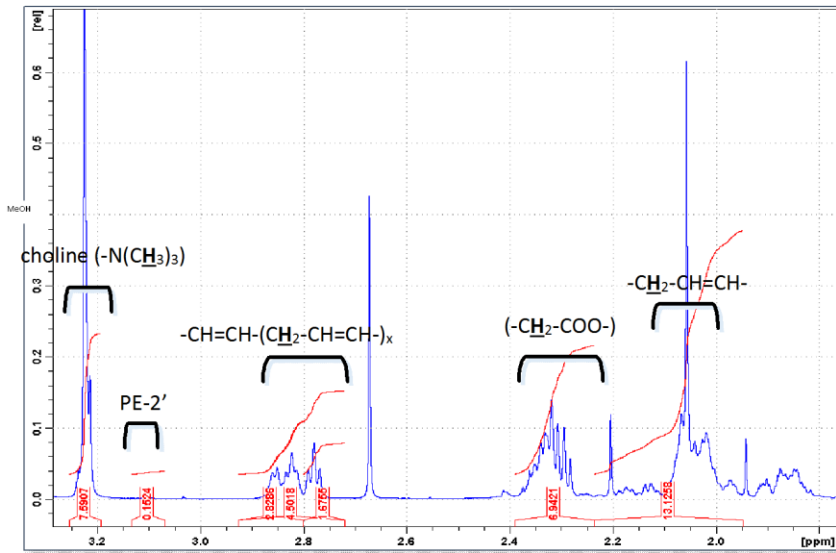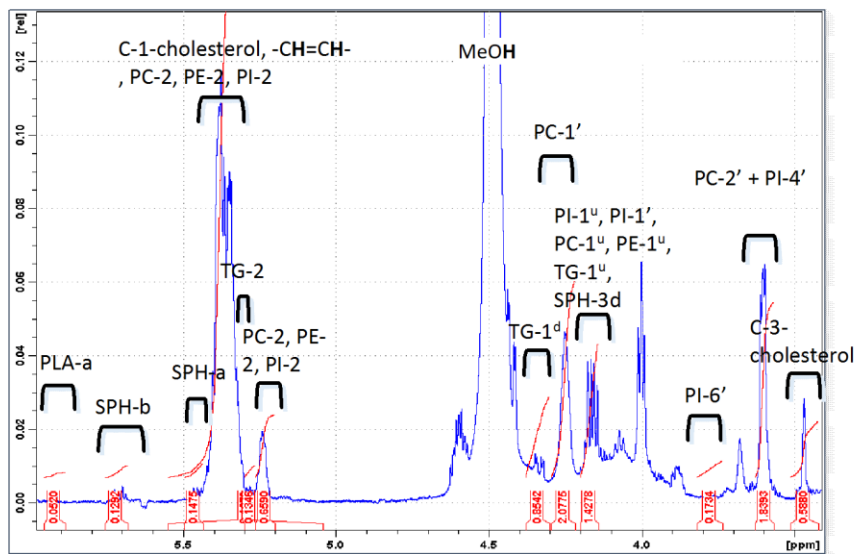

**Supplemental Figure S6: CH<sub>3</sub> group and cholesterol signal quantification.** (A) <sup>1</sup>H-NMR spectra of neat cholesterol in CDCl<sub>3</sub>/MeOD with line broadenings LB adapted to the line width of the C-18H<sub>3</sub> resonance of cholesterol of native LDL at 323 K and 293 K. (B) Spectra obtained after subtracting the artificial cholesterol spectra (A) from the CH<sub>2</sub>/CH<sub>3</sub> region of LDL.

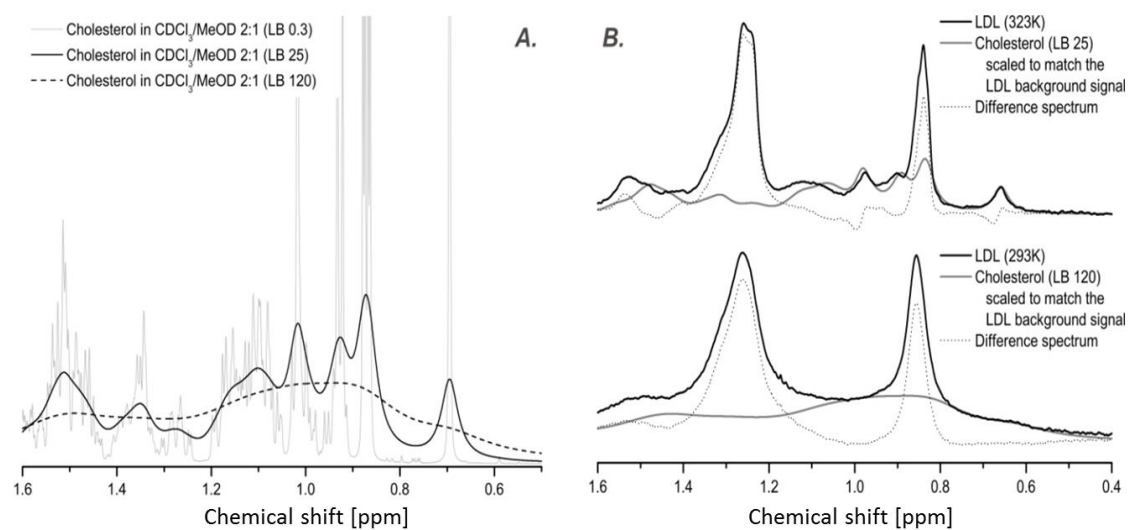

Supplement: 10.1194_M092643_jlr.M092643-1.pdf [file 10.1194_M092643_jlr.M092643-1.pdf]
